# Supplementary material for: Constructions of tetrahydro-γ-carboline skeletons via intramolecular oxidative carbon–carbon bond formation of enamines
Source: Royal Society of Chemistry journal article supplement (doi:10.1039/c3ob00039g), 2013-01-01

Supplementary Material (ESI) for Organic & Biomolecular Chemistry  
This journal is (c) The Royal Society of Chemistry 2012

Supporting Information for

**Constructions of Tetrahydro- $\gamma$ -carboline Skeletons via**

**Intramolecular Oxidative Carbon-Carbon Bond Formation of**

**Enamines**

Jinglei Lv, Ji Li, Daisy Zhang-Negrerie, Siyun Shang, Qingzhi Gao,  
Yunfei Du\* and Kang Zhao\*

*Tianjin Key Laboratory for Modern Drug Delivery & High-Efficiency, School of  
Pharmaceutical Science and Technology, Tianjin University, Tianjin 300072, P. R. of China*

E-mail: duyunfeier@tju.edu.cn, kangzhao@tju.edu.cn

Fax: +86-22-27404031 Tel: +86-22-27404031

**Supplementary Material**

|                                                 | Page    |
|-------------------------------------------------|---------|
| I General Information                           | S2      |
| II Experimental section                         | S3-S8   |
| III References                                  | S9      |
| IV $^1\text{H}$ and $^{13}\text{C}$ NMR spectra | S10-S20 |

Supplementary Material (ESI) for Organic & Biomolecular Chemistry  
This journal is (c) The Royal Society of Chemistry 2012

## General Information

$^1\text{H}$  and  $^{13}\text{C}$  NMR spectra were recorded on a 400 MHz spectrometer at 25 °C. Chemical shifts values are given in ppm and referred as the internal standard to TMS: 0.00 ppm. The peak patterns are indicated as follows: s, singlet; d, doublet; t, triplet; q, quadruplet; m, multiplet; br, broad and dd, doublet of doublets. The coupling constants J, are reported in Hertz (Hz). High-resolution mass spectra (HRMS) were obtained on a Q-TOF micro spectroMeter. Melting points were determined with a national micromelting point apparatus without corrections. TLC plates were visualized by exposure to ultraviolet light. Dichloromethane was dried by  $\text{CaH}_2$  before use, other reagents and solvents were purchased as reagent grade and were used without further purification. Flash column chromatography was performed over silica gel 200-300 m and the eluent was a mixture of ethyl acetate (EA) and petroleum ether (PE), or a mixture of methanol (M) and dichloromethane (D).

## Experimental section

### Methyl 3-(methylamino)propanoate (**2**)

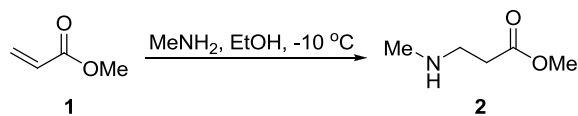

Compound **2** was obtained according to published procedure.<sup>1</sup> Yield: 86%, colorless oil.

### Methyl 3-[(*tert*-butoxycarbonyl)(methyl)amino]propanoate (**3**)<sup>2</sup>

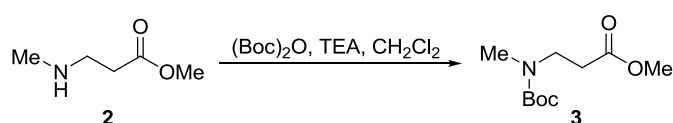

To a stirred solution of **2** (9.4 g, 80 mmol) in dry CH<sub>2</sub>Cl<sub>2</sub> (200 mL), Boc<sub>2</sub>O (19.0 g, 88 mmol) and Et<sub>3</sub>N (22 mL, 160 mmol) were added. The resulted mixture was stirred at rt until TLC indicated the total consumption of **2**. To the reaction mixture was added saturated aq. NH<sub>4</sub>Cl solution (100 mL) and stirred for another 30 min, CH<sub>2</sub>Cl<sub>2</sub> was used to extract the mixture. The organic phase, after dried with anhydrous Na<sub>2</sub>SO<sub>4</sub>, was evaporated to remove the solvent, and the residue was purified by chromatography to afford the desired product **3** (17.4 g, 75 mmol). Yield: 94%, colorless oil. <sup>1</sup>H NMR (400 MHz, CDCl<sub>3</sub>): δ 3.69 (s, 3H), 3.51 (t, *J* = 6.8 Hz, 2H), 2.87 (s, 3H), 2.55 (t, *J* = 6.8 Hz, 2H), 1.46(s, 9H). <sup>13</sup>C NMR (101 MHz, CDCl<sub>3</sub>): δ 171.9, 155.2, 79.3, 51.4, 44.9, 34.5, 32.9, 28.2.

### 3-[(*tert*-Butoxycarbonyl)(methyl)amino]propanoic acid (**4**)<sup>3</sup>

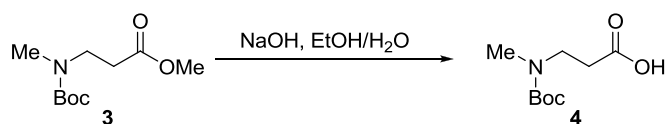

To a stirred solution of **3** (6.5 g, 30 mmol) in alcohol (150 mL) was added 50 mL aq. NaOH (1.8 g, 45 mmol) solution dropwise, the resulted mixture was stirred at rt until TLC indicated the total consumption of **3**. The mixture was evaporated to remove the alcohol, and the resulted solution was carefully acidified by aq. HCl (2 N) until the pH reached 3. EA was used to extract the mixture. The combined organic phase, after dried with anhydrous Na<sub>2</sub>SO<sub>4</sub>, was evaporated to

Supplementary Material (ESI) for Organic & Biomolecular Chemistry  
This journal is (c) The Royal Society of Chemistry 2012

remove the solvent under vacuum and the residue was purified by chromatography to give the desired product **4** (5.8 g, 28 mmol). Yield: 95%, colorless oil.  $^1\text{H}$  NMR (400 MHz,  $\text{CDCl}_3$ ):  $\delta$  3.53 (t,  $J = 6.9$  Hz, 2H), 2.89 (s, 3H), 2.61 (t,  $J = 6.8$  Hz, 2H), 1.47 (s, 9H).

#### Eethyl 5-[methyl(*tert*-butoxycarbonyl)amino]-3-oxopentanoate (**5**)<sup>4</sup>

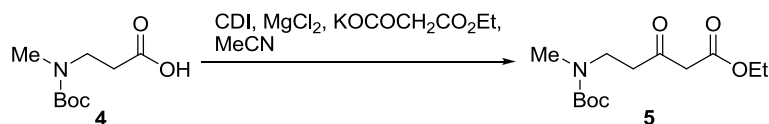

Under  $\text{N}_2$ , CDI (4.2 g, 26 mmol) was added to a stirred solution of **4** (4.9 g, 24 mmol) in anhydrous MeCN (120 mL) and the mixture was stirred at rt for 2 h. A solid mixture of anhydrous  $\text{MgCl}_2$  (3.0 g, 31 mmol) and potassium monomethyl malonate (6.2 g, 36 mmol) was added, the mixture was stirred under  $\text{N}_2$  at 40  $^\circ\text{C}$  until TLC indicated the total consumption of starting material. To the reaction mixture was added aq. HCl (2 N) dropwise until the pH reached 3. EA was used to extract the mixture. The combined organic phase, after dried with anhydrous  $\text{Na}_2\text{SO}_4$ , was evaporated to remove the solvent under vacuum and the residue was purified by column chromatography to afford the desired product **5** (6.0 g, 22 mmol). Yield: 92%, colorless oil.  $^1\text{H}$  NMR (400 MHz,  $\text{CDCl}_3$ ):  $\delta$  4.26-4.11 (m, 2H), 3.46 (m, 4H), 2.85-2.82 (m, 5H), 1.43 (s, 9H), 1.32-1.20 (m, 3H).  $^{13}\text{C}$  NMR (101 MHz,  $\text{CDCl}_3$ ):  $\delta$  166.93, 155.48, 79.62, 61.36, 59.99, 49.45, 43.88, 41.48, 34.86, 28.36, 14.04.

#### General procedure for the preparation of **7a** and **7b**<sup>5</sup>

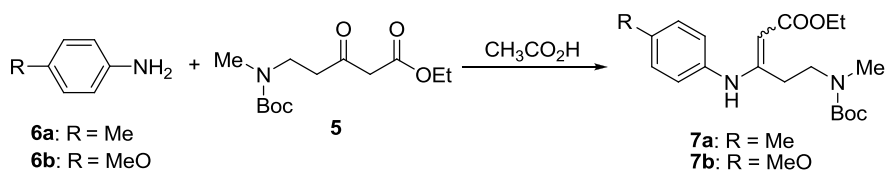

A mixture of compound **5** (23 mmol), substituted aniline **6** (25 mmol) and acetic acid (25 mmol) were stirred at room temperature for 18 h. After the completion of the reaction, EtOH (50 mL) was added. The solution was dried with anhydrous  $\text{Na}_2\text{SO}_4$ , filtered and concentrated under reduced pressure. The residue was purified by flash column chromatography on silica gel to give the desired products **7a-7b**, which were characterized as follows:

**Ethyl 5-[(*tert*-butoxycarbonyl)(methyl)amino]-3-(*p*-tolylamino)pent-2-enoate (**7a**)**

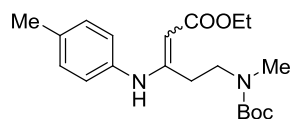

Following the general procedure, **7a** was obtained. Yield: 94%, white solid, mp 94-96 °C. <sup>1</sup>H NMR (600 MHz, CDCl<sub>3</sub>): δ 10.16 (s, 1H), 7.17-7.11 (d, 2H), 7.07-6.96 (d, 2H), δ 4.14 (q, *J* = 7.0 Hz, 2H), 3.24 (t, *J* = 6.9 Hz, 2H), 2.65 (s, 3H), 2.47 (d, *J* = 6.8 Hz, 2H), 2.33 (s, 3H), 1.39 (s, 9H), 1.28 (t, *J* = 7.1 Hz, 3H). <sup>13</sup>C NMR (151 MHz, CDCl<sub>3</sub>): δ 170.50, 160.49, 154.97, 136.33, 135.65, 129.81, 125.63, 85.71, 79.56, 58.79, 48.08, 34.11, 30.76, 28.41, 20.89, 14.56. HRMS (ESI) *m/z* calcd for C<sub>20</sub>H<sub>31</sub>N<sub>2</sub>O<sub>4</sub><sup>+</sup> [*M* + *H*<sup>+</sup>] 363.2278, found 363.2280.

**Ethyl 5-[(*tert*-butoxycarbonyl)(methyl)amino]-3-[(4-methoxyphenyl)amino]pent-2-enoate (**7b**)**

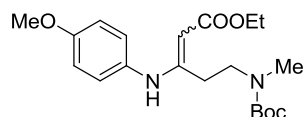

Following the general procedure, **7b** was obtained. Yield: 91%, white solid, mp 78-79 °C. <sup>1</sup>H NMR (600 MHz, CDCl<sub>3</sub>): δ 10.06 (s, 1H), 7.18-6.97 (m, 2H), 6.86 (d, *J* = 18.3, 8.8 Hz, 2H), 4.14 (q, *J* = 7.0 Hz, 2H), 3.80 (s, 3H), 3.23 (s, 2H), 2.64 (s, 3H), 2.41 (s, 2H), 1.40 (s, 9H), 1.31-1.24 (m, 3H). <sup>13</sup>C NMR (151 MHz, CDCl<sub>3</sub>): δ 170.53, 160.96, 157.86, 155.30, 131.71, 127.57, 114.38, 85.20, 79.55, 58.74, 55.43, 48.07, 34.09, 30.73, 28.35, 14.56. HRMS (ESI) *m/z* calcd for C<sub>20</sub>H<sub>31</sub>N<sub>2</sub>O<sub>5</sub><sup>+</sup> [*M* + *H*<sup>+</sup>] 379.2227, found 379.2228.

**General procedure for the preparation of **8a** and **8b****<sup>6</sup>

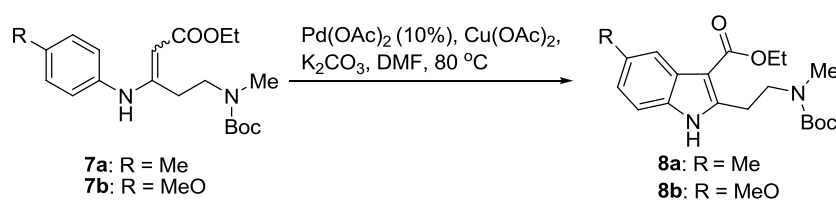

**7** (5 mmol) was stirred with Pd(OAc)<sub>2</sub> (0.5 mmol), Cu(OAc)<sub>2</sub> (15 mmol), K<sub>2</sub>CO<sub>3</sub> (15 mmol) and DMF (50 mL) under N<sub>2</sub> in a preheated oil bath at 80 °C for 4 h until TLC indicated the total consumption of starting material. The reaction mixture was diluted with EA (150 mL) and filtered through a short pad of silica. The solid was washed with EA (50 mL), and the combined filtrates were evaporated to dryness. The residue was purified by flash column chromatography on silica gel to give the desired products **8a-8b**, which were characterized as follows:

**Ethyl 2-{2-[(*tert*-butoxycarbonyl)(methyl)amino]ethyl}-5-methyl-1*H*-indole-3-carboxylate (8a)**

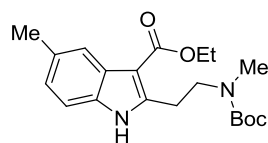

Following the general procedure, **8a** was obtained. Yield: 89%, light brown solid, mp 99-102 °C. <sup>1</sup>H NMR (600 MHz, CDCl<sub>3</sub>): δ 10.48 (s, 1H), 7.87 (s, 1H), 7.21 (d, *J* = 6.4 Hz, 1H), 7.00 (d, *J* = 9.2 Hz, 1H), 4.44-4.37 (q, *J* = 7.0 Hz, 2H), 3.74 (m, 2H), 3.47 (m, 2H), 2.86 (s, 3H), 2.46 (s, 3H), 1.56-1.32 (m, 12H). <sup>13</sup>C NMR (151 MHz, CDCl<sub>3</sub>): δ 166.24, 157.06, 145.17, 133.28, 130.88, 127.40, 123.67, 120.91, 110.84, 103.60, 80.58, 59.32, 45.91, 34.05, 28.38, 26.97, 21.73, 14.72. HRMS (ESI) *m/z* calcd for C<sub>20</sub>H<sub>28</sub>N<sub>2</sub>NaO<sub>4</sub><sup>+</sup> [*M* + Na<sup>+</sup>] 383.1941, found 383.1942.

**Ethyl 2-{2-[(*tert*-butoxycarbonyl)(methyl)amino]ethyl}-5-methoxy-1*H*-indole-3-carboxylate (8b)**

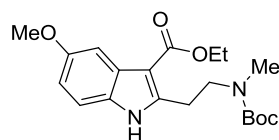

Following the general procedure, **8b** was obtained. Yield: 90%, light brown solid, mp 82-86 °C. <sup>1</sup>H NMR (400 MHz, CDCl<sub>3</sub>): δ 10.54 (s, 1H), 7.63 (s, 1H), 7.24 (d, *J* = 8.6 Hz, 1H), 6.84 (d, *J* = 8.7 Hz, 1H), 4.42 (q, *J* = 7.1 Hz, 2H), 3.89 (s, 3H), 3.75 (m, 2H), 3.49 (m, 2H), 2.88 (s, 3H), 1.59-1.28 (m, 12H). <sup>13</sup>C NMR (101 MHz, CDCl<sub>3</sub>): δ 166.06, 157.07, 155.52, 145.45, 129.99, 128.03, 112.01, 111.81, 103.90, 103.49, 80.45, 59.29, 55.71, 46.01, 34.08, 28.32, 27.04, 14.65. RMS (ESI) *m/z* calcd for C<sub>20</sub>H<sub>28</sub>N<sub>2</sub>NaO<sub>5</sub><sup>+</sup> [*M* + Na<sup>+</sup>] 399.1890, found 399.1894.

**General procedure for the preparation of 9a and 9b**

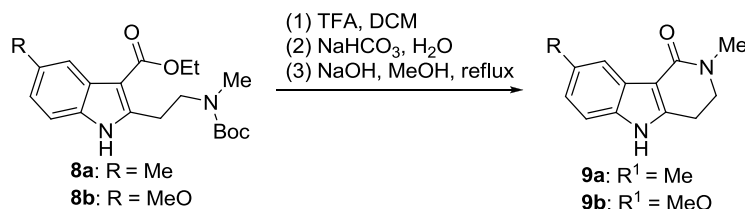

To a stirred solution of **8** (5 mmol) in CH<sub>2</sub>Cl<sub>2</sub> (100 mL) was added TFA (25 mL) dropwise at 0 °C under N<sub>2</sub>. The mixture was stirred at rt until TLC indicated the total consumption of starting material. The mixture was evaporated to remove the solvent and excess TFA. Then saturated NaHCO<sub>3</sub> (60 mL) was added and CH<sub>2</sub>Cl<sub>2</sub> was used to extract the mixture. The combined organic

phase, after dried with anhydrous Na<sub>2</sub>SO<sub>4</sub>, was evaporated to remove the solvent. The residue was redissolved in MeOH (100 mL), NaOH (6 mmol) was added, the resulted mixture was refluxed for 5 h. After the completion of the reaction, the mixture was evaporated to remove the solvent. The residue was purified by flash column chromatography on silica gel to give the desired products **9a-9b**, which were characterized as follows:

#### 2,8-Dimethyl-2,3,4,5-tetrahydro-1H-pyrido[4,3-b]indol-1-one (**9a**)

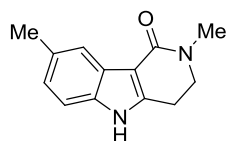

Following the general procedure, **9a** was obtained. Yield: 91%, white solid, mp > 300 °C. <sup>1</sup>H NMR (600 MHz, DMSO): δ 11.44 (s, 1H), 7.70 (s, 1H), 7.25 (s, 1H), 6.93 (s, 1H), 3.58 (t, 2H), 3.03 (t, 2H), 2.93 (s, 3H), 2.37 (s, 3H). <sup>13</sup>C NMR (151 MHz, DMSO): δ 164.83, 143.40, 134.28, 129.10, 125.61, 122.81, 119.38, 111.07, 104.87, 48.07, 33.17, 22.29, 21.24. HRMS (ESI) *m/z* calcd for C<sub>13</sub>H<sub>15</sub>N<sub>2</sub>O<sup>+</sup> [M + H<sup>+</sup>] 215.1179, found 215.1184.

#### 8-Methoxy-2-methyl-2,3,4,5-tetrahydro-1H-pyrido[4,3-b]indol-1-one (**9b**)

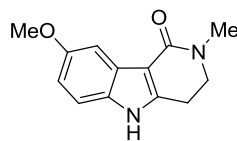

Following the general procedure, **9b** was obtained. Yield: 92%, white solid, mp 294-296 °C. <sup>1</sup>H NMR (600 MHz, DMSO): δ 7.37 (s, 1H), 7.29 (d, *J* = 6.3 Hz, 1H), 6.75-6.70 (m, 1H), 3.75 (s, 3H), 3.56 (t, *J* = 6.9 Hz, 2H), 3.04 (t, *J* = 6.7 Hz, 2H), 2.93 (s, 3H). <sup>13</sup>C NMR (151 MHz, DMSO): δ 164.91, 154.42, 143.80, 130.86, 126.01, 112.26, 110.88, 105.09, 101.63, 55.16, 48.07, 33.12, 22.41. HRMS (ESI) *m/z* calcd for C<sub>13</sub>H<sub>15</sub>N<sub>2</sub>O<sub>2</sub><sup>+</sup> [M + H<sup>+</sup>] 231.1128, found 231.1130.

#### General procedure for the preparation of **10a** and **10b**<sup>7</sup>

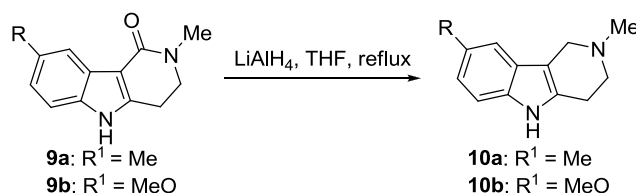

To a suspension of LiAlH<sub>4</sub> (6 mmol) in anhydrous THF (20 mL) was added **9** (2 mmol) at 0°C. The resulted mixture was stirred at reflux temperature for 4 h. The reaction mixture was cooled to 0 °C before water (5 mL) was added dropwise. CH<sub>2</sub>Cl<sub>2</sub> was used to extract the mixture. The organic phase, after dried with anhydrous Na<sub>2</sub>SO<sub>4</sub>, was evaporated to remove the solvent under vacuum.

The residue was purified by flash column chromatography on silica gel to give the desired products **10a-10b**, which were characterized as follows:

**2,8-Dimethyl-2,3,4,5-tetrahydro-1H-pyrido[4,3-*b*]indole (10a)**

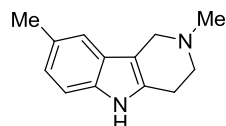

Following the general procedure, **10a** was obtained. Yield: 85%, white solid, mp 97-99 °C. <sup>1</sup>H NMR (400 MHz, DMSO): δ 10.75 (s, 1H), 7.15 (d, *J* = 8.4 Hz, 1H), 7.11 (s, 1H), 6.84 (d, *J* = 8.4 Hz, 2H), 3.72 (s, 2H), 2.91-2.93 (m, 2H), 2.85-2.86 (m, 2H), 2.51 (s, 3H), 2.35 (s, 3H). HRMS (ESI) *m/z* calcd for C<sub>13</sub>H<sub>17</sub>N<sub>2</sub><sup>+</sup> [*M* + *H*<sup>+</sup>] 201.1386, found 201.1388.

**8-Methoxy-2-methyl-2,3,4,5-tetrahydro-1H-pyrido[4,3-*b*]indole (10b)**

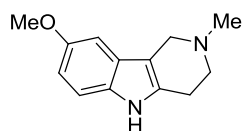

Following the general procedure, **10b** was obtained. Yield: 88%, white solid, mp 149-151 °C. <sup>1</sup>H NMR (400 MHz, CDCl<sub>3</sub>): δ 8.29 (s, 1H), 7.13 (d, *J* = 8.7 Hz, 1H), 6.87 (s, 1H), 6.77 (d, *J* = 8.7, 1H), 3.86 (s, 3H), 3.70 (s, 2H), 2.84 (t, *J* = 5.6 Hz, 2H), 2.80 (t, *J* = 5.5 Hz, 2H), 2.60 (s, 3H). HRMS (ESI) *m/z* calcd for C<sub>13</sub>H<sub>17</sub>N<sub>2</sub>O<sup>+</sup> [*M* + *H*<sup>+</sup>] 217.1335, found 217.1338.

**1-Methyl-4-(*p*-tolylamino)-5,6-dihydropyridin-2(1H)-one (15)**

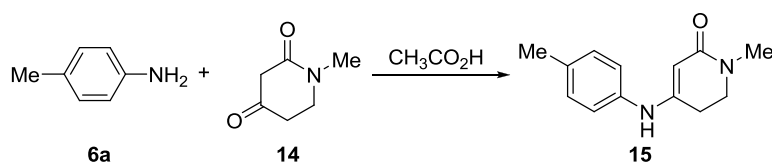

1-Methylpiperidine-2,4-dione **14** was prepared by the known method.<sup>8</sup> **14** (2.9 g, 23 mmol), *p*-toluidine (2.7 g, 25 mmol) and acetic acid (150 mg, 25 mmol) were stirred at rt for 18 h. After the completion of the reaction, EtOH (50 mL) was added, the solution was dried with anhydrous Na<sub>2</sub>SO<sub>4</sub>, filtered and concentrated under reduced pressure. The residue was purified by column chromatography to afford the pure product **15** (4.5 g, 21 mmol). Yield: 92%, white solid, mp 179-180 °C. <sup>1</sup>H NMR (600 MHz, CDCl<sub>3</sub>): δ 7.06 (d, *J* = 12 Hz, 2H), 7.01 (d, *J* = 6 Hz, 2H), 5.25 (s, 1H), 3.34 (t, *J* = 6 Hz, 2H), 2.92(s, 3H), 2.54(t, *J* = 6 Hz, 2H), 2.29(s, 3H). <sup>13</sup>C NMR (151 MHz, CDCl<sub>3</sub>): δ 169.18, 152.56, 136.83, 133.83, 129.71, 122.44, 90.74, 46.82, 34.21, 28.70, 20.85. HRMS (ESI) *m/z* calcd for C<sub>13</sub>H<sub>17</sub>N<sub>2</sub>O<sup>+</sup> [*M* + *H*<sup>+</sup>] 217.1335, found 217.1335.

Supplementary Material (ESI) for Organic & Biomolecular Chemistry  
This journal is (c) The Royal Society of Chemistry 2012

## References:

- 1 D. R. Howton, *J. Org. Chem.*, 1945, **10**, 277.
- 2 (a) Y. Özlü, D. E. Cladingboe and P. J. Parsons, *Tetrahedron Lett.*, 1991, **50**, 2183; (b) S. Vassiss, G. Karigiannis, G. Balayiannis, M. Militopoulou, P. Mamos, G. W. Francis and D. Papaioannou, *Tetrahedron Lett.*, 2001, **42**, 1579; (c) K. M. Brinner, J. M. Kim, H. Habashita, I. Y. Gluzman, D. E. Goldberg and J. A. Ellman, *Bioorg. Med. Chem.*, 2002, **10**, 3649; (d) S. Varghese, D. Gupta, T. Baran, A. Jiemjit, S. D. Gore, R. A. Casero and P. W. Woster, *J. Med. Chem.*, 2005, **48**, 6350.
- 3 K. Ryuichi, K. Yasuhiko, T. Yukio, F. Toshio, K. Takashi, T. Shozo and F. Masahiro, WO2003016275, PCT/JP2002/008108, 2003.
- 4 M. Birch, S. Challenger, J. P. Crochard, D. Fradet, H. Jackman, A. Luan, E. Madigan, N. McDowall, K. Meldrum, C. M. Gordon, M. Widegren, and S. Yeo, *Org. Process Res. Dev.*, 2011, **15**, 1172.
- 5 (a) C. R. Hauser and G. A. Reynolds, *J. Am. Chem. Soc.*, 1948, **70**, 2402; (b) Y. Abe, H. Kayakiri, S. Satoh, T. Inoue, Y. Sawada, N. Inamura, M. Asano, I. Aramori, C. Hatori, H. Sawai, T. Oku and H. Tanaka, *J. Med. Chem.*, 1998, **41**, 4062; (c) Q. Dai, W. Yang and X. Zhang, *Org. Lett.*, 2005, **7**, 5343; (d) S. Würtz, S. Rakshit, J. J. Neumann, T. Dröge and F. Glorius, *Angew. Chem. Int. Ed.*, 2008, **47**, 7230; (e) W. Yu, Y. Du and K. Zhao, *Org. Lett.*, 2009, **11**, 2417; (f) M. Zhao, F. Wang and X. Li, *Org. Lett.*, 2012, **14**, 1412.
- 6 (a) S. Würtz, S. Rakshit, J. J. Neumann, T. Dröge and F. Glorius, *Angew. Chem. Int. Ed.*, 2008, **47**, 7230; (b) J. J. Neumann, S. Rakshit, T. Dröge, S. Würtz and F. Glorius, *Chem. Eur. J.*, 2011, **17**, 7298.
- 7 T. Yasuhara, K. Nishimura, M. Yamashita, N. Fukuyama, K. I. Yamada, O. Muraoka and K. Tomioka, *Org. Lett.*, 2003, **5**, 1123.
- 8 J. R. Allen, M. P. Bourbeau, N. Chen, E. Hu, R. Kunz and S. Rumfelt, WO2010057121, PCT/US2009/064637, 2010.

Supplementary Material (ESI) for Organic & Biomolecular Chemistry  
This journal is (c) The Royal Society of Chemistry 2012

# <sup>1</sup>H and <sup>13</sup>C NMR Spectra

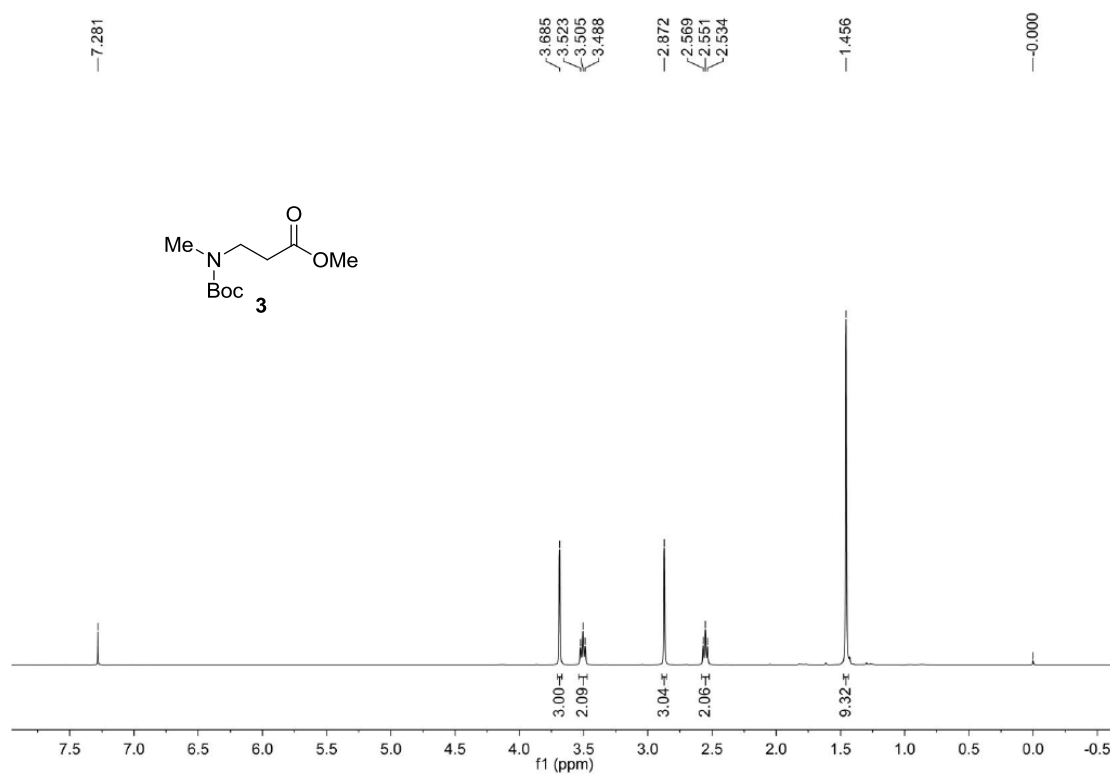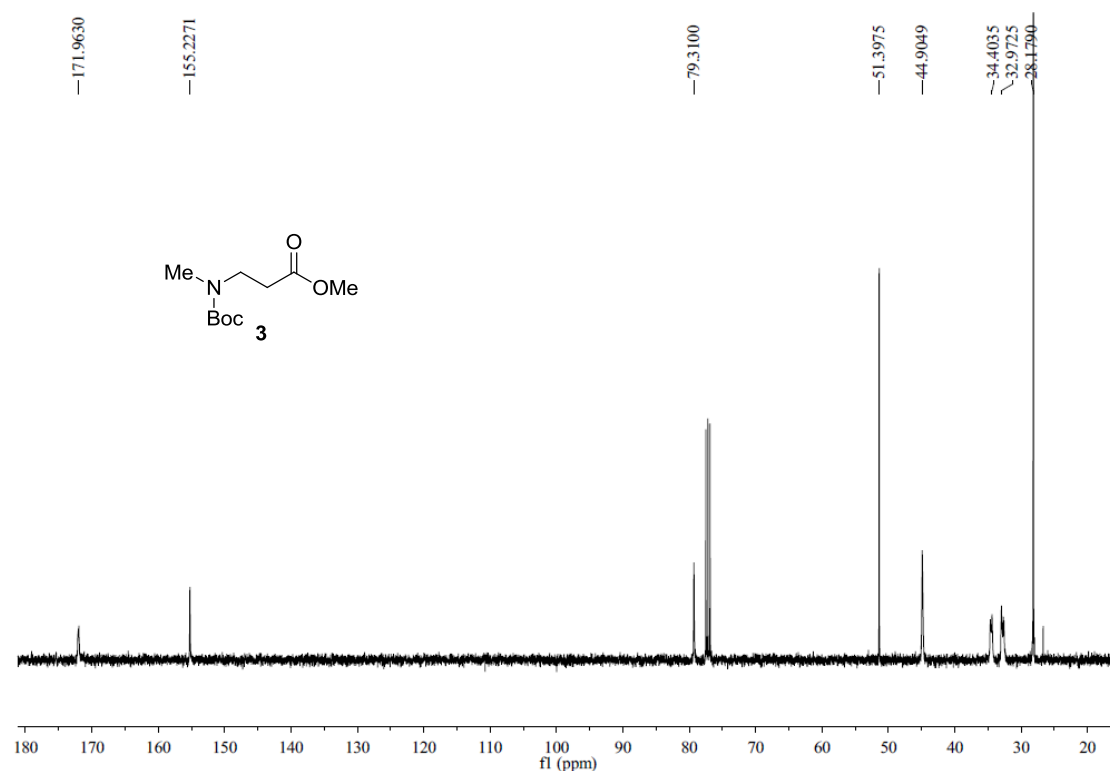



Supplementary Material (ESI) for Organic & Biomolecular Chemistry  
This journal is (c) The Royal Society of Chemistry 2012

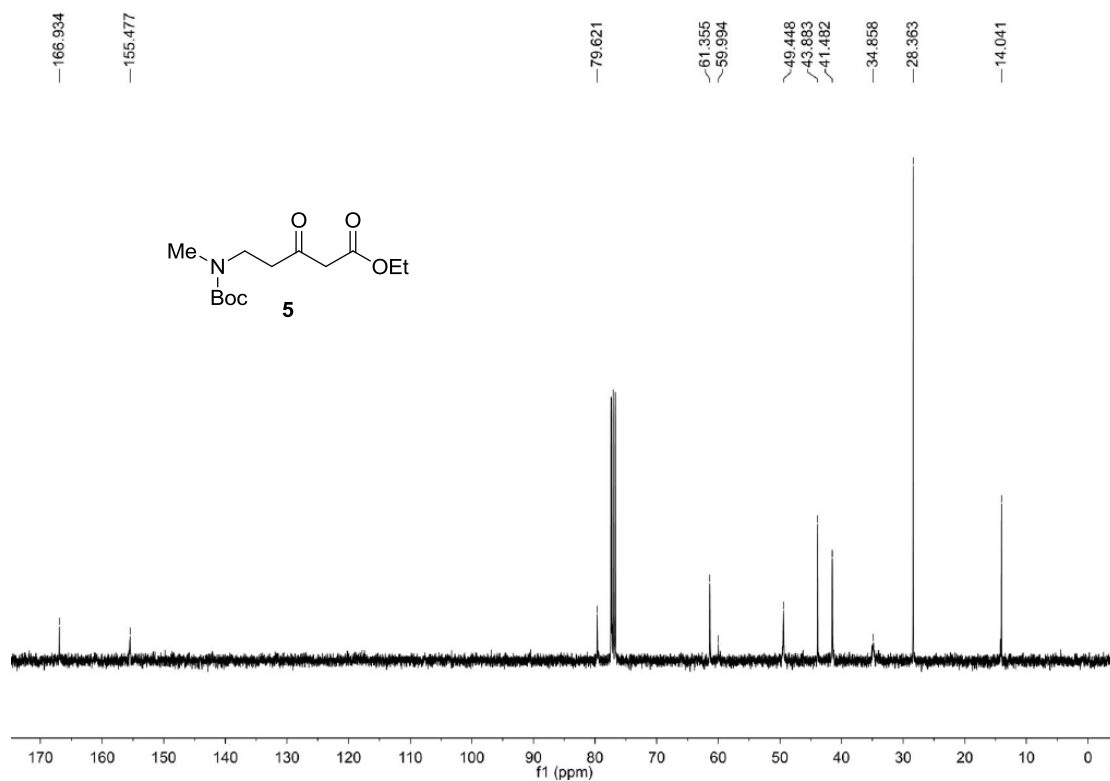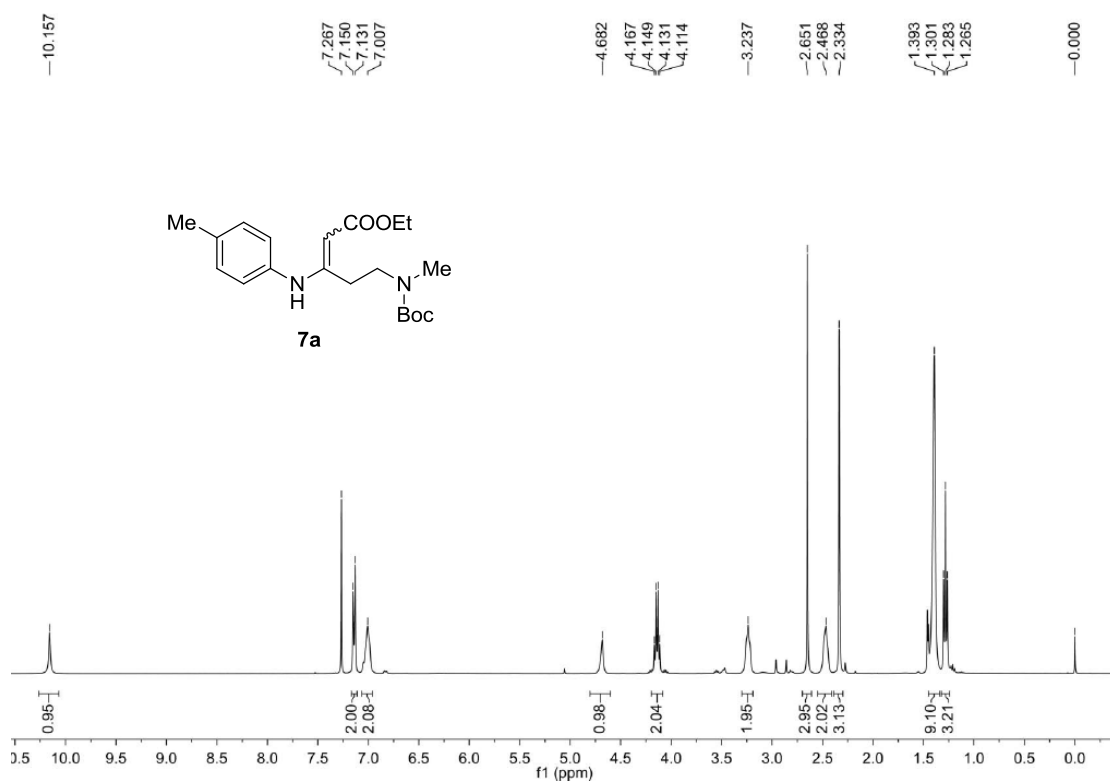

Supplementary Material (ESI) for Organic & Biomolecular Chemistry  
This journal is (c) The Royal Society of Chemistry 2012

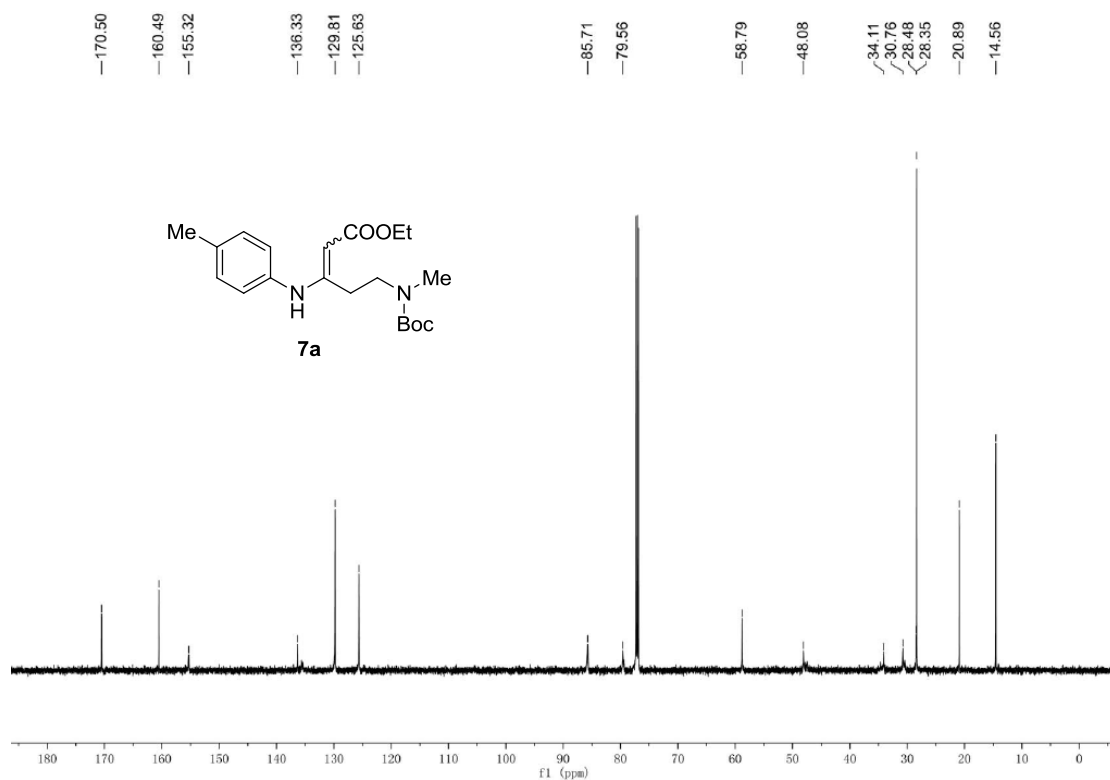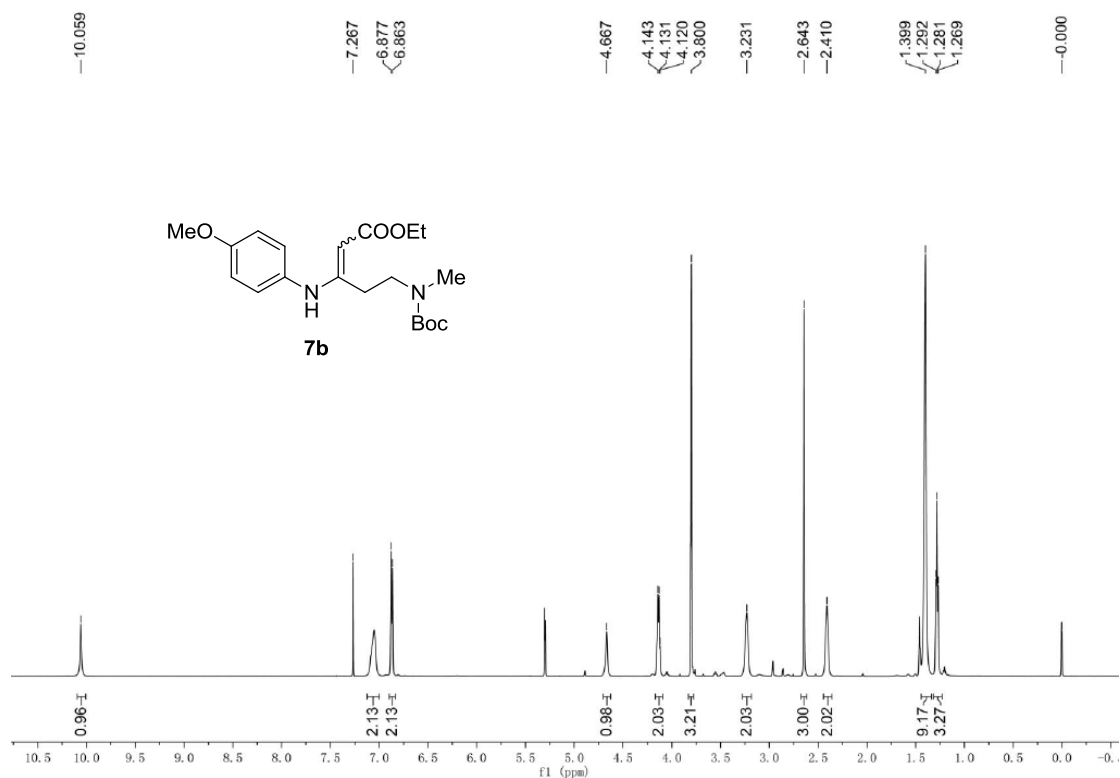

Supplementary Material (ESI) for Organic & Biomolecular Chemistry  
This journal is (c) The Royal Society of Chemistry 2012

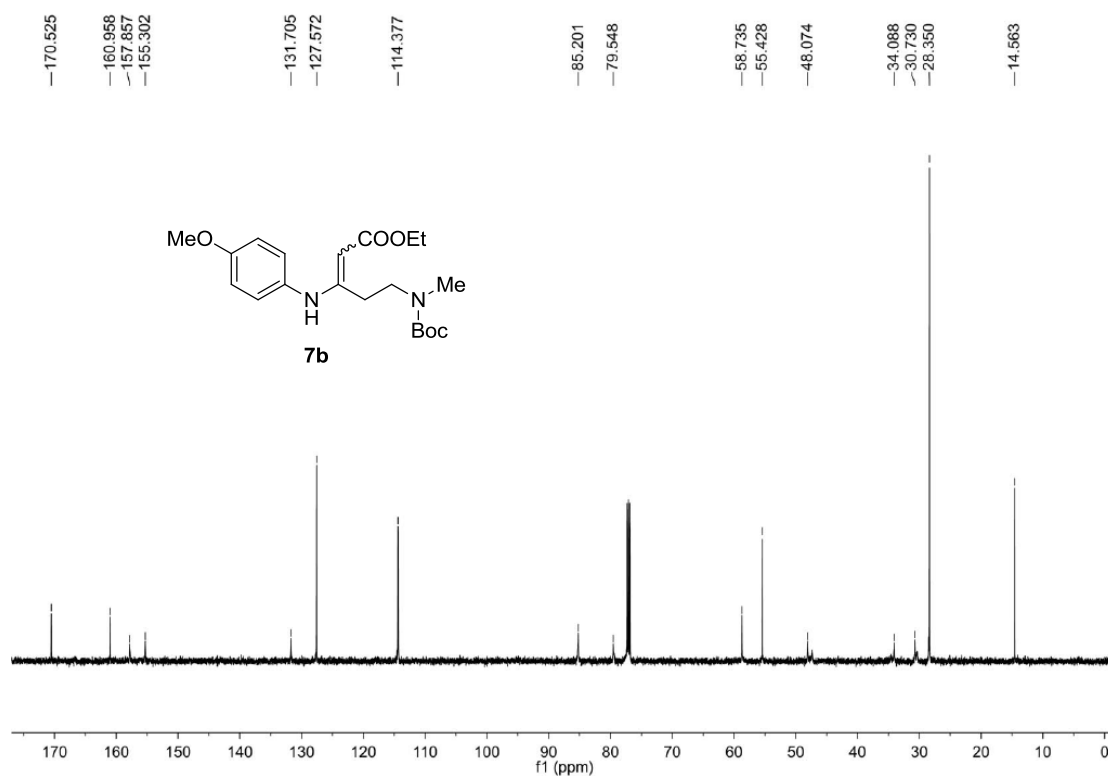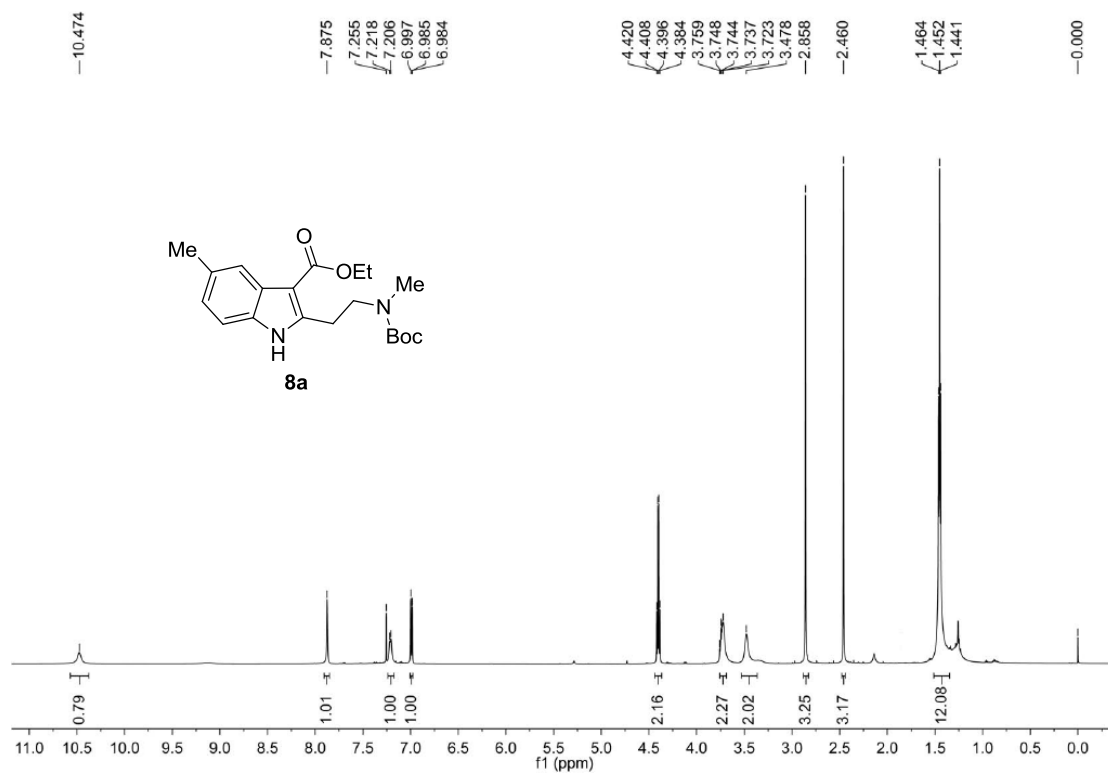

Supplementary Material (ESI) for Organic & Biomolecular Chemistry  
This journal is (c) The Royal Society of Chemistry 2012

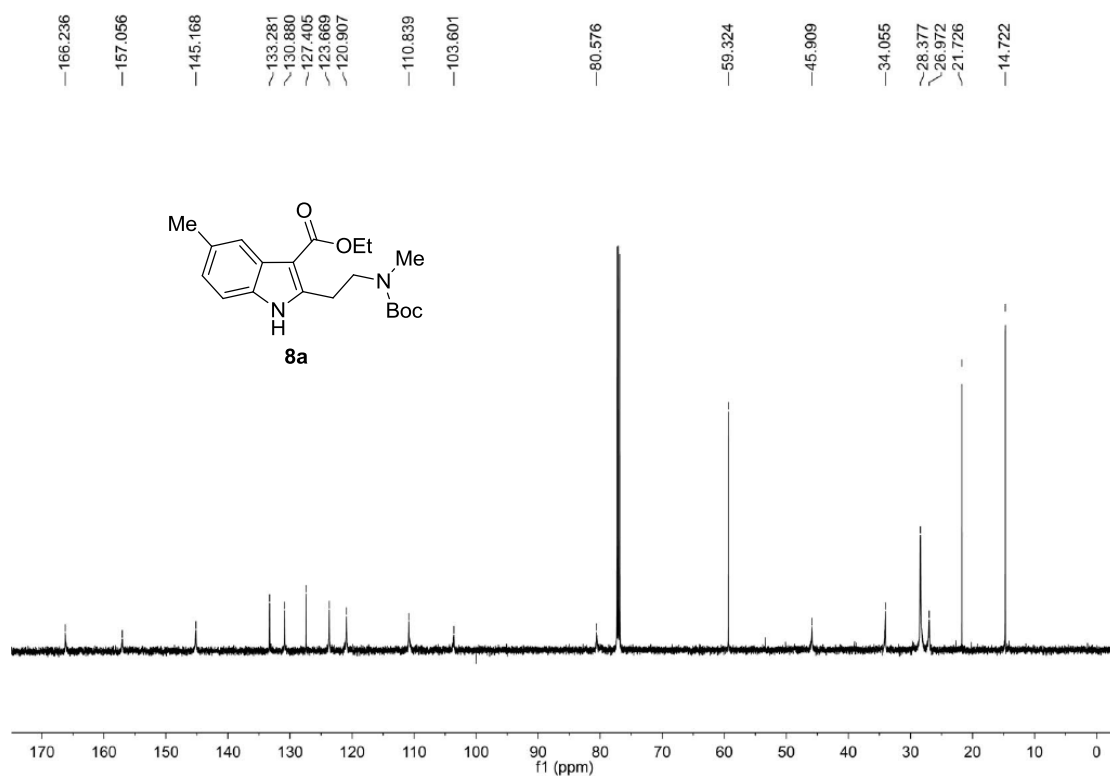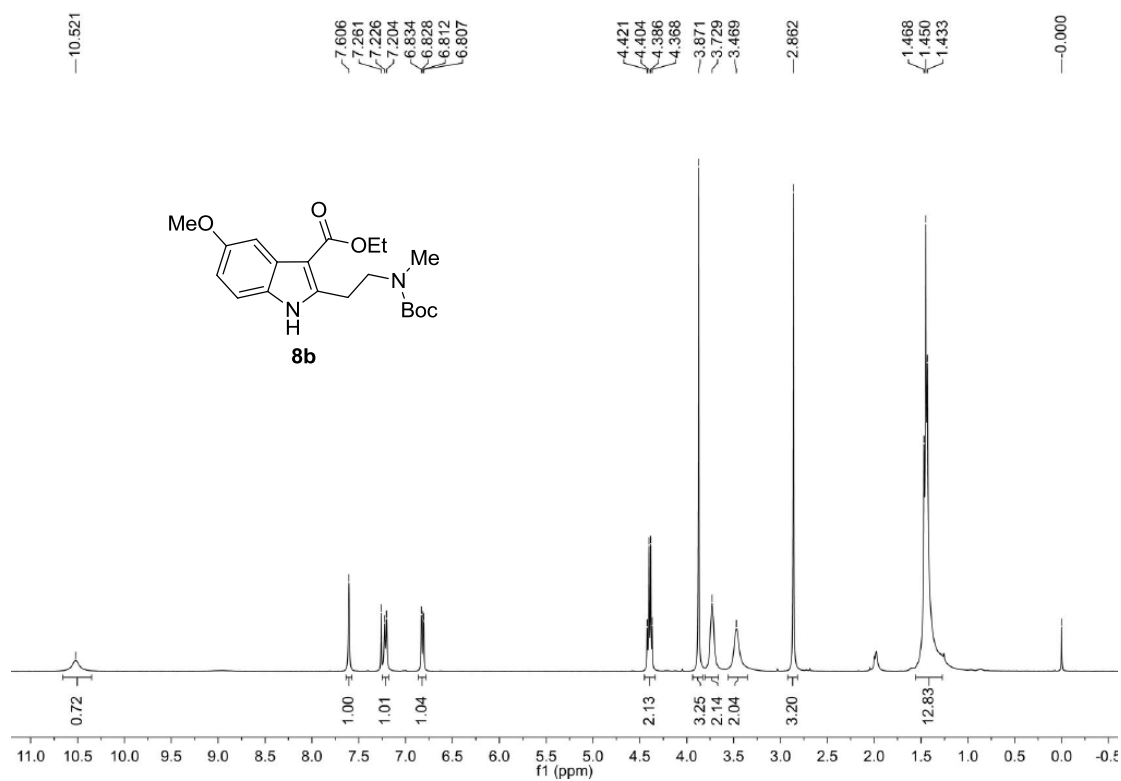

Supplementary Material (ESI) for Organic & Biomolecular Chemistry  
This journal is (c) The Royal Society of Chemistry 2012

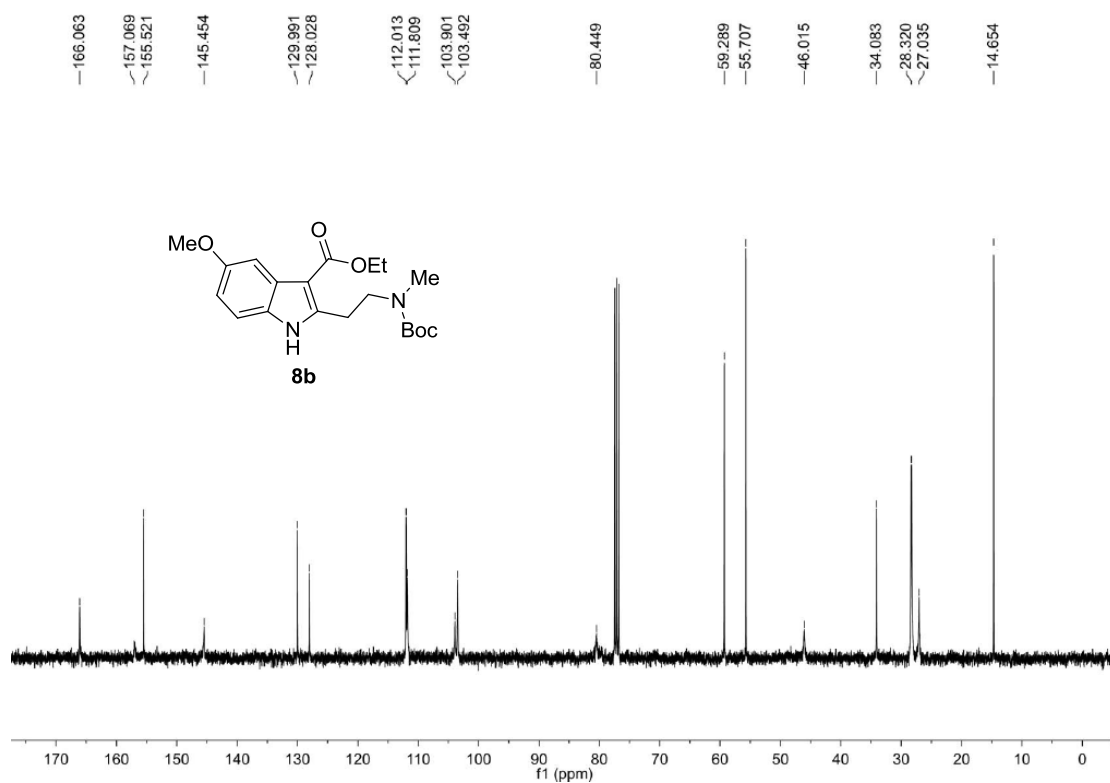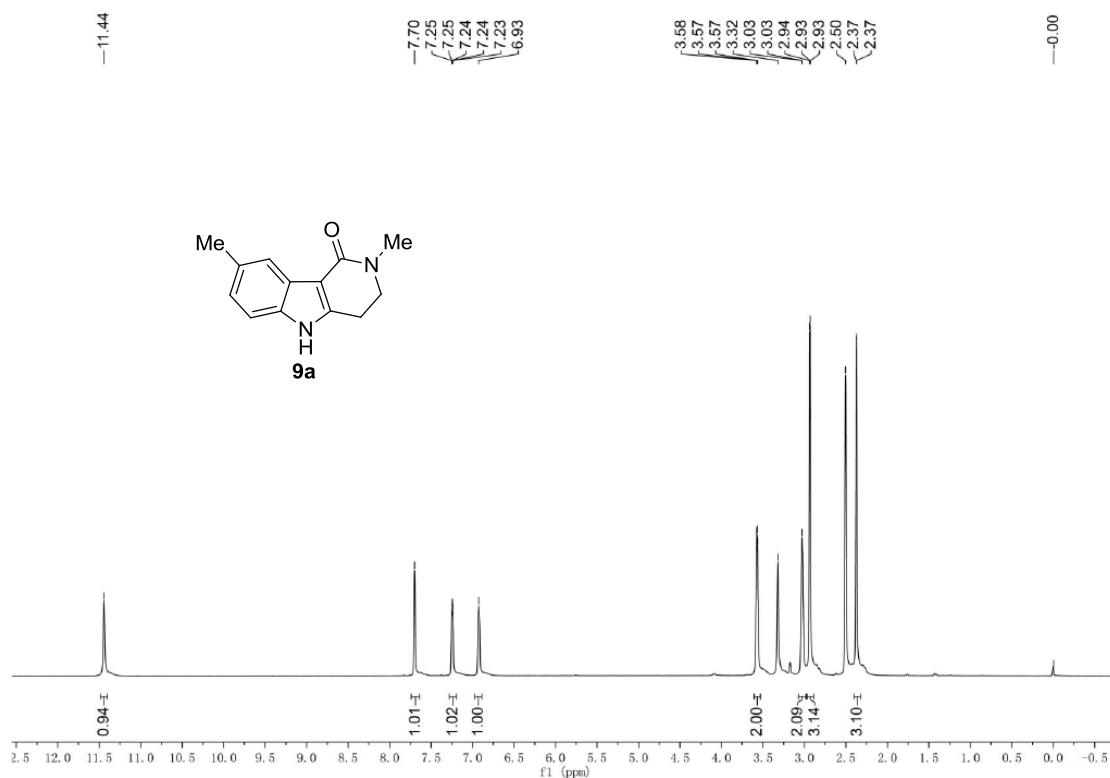

Supplementary Material (ESI) for Organic & Biomolecular Chemistry  
 This journal is (c) The Royal Society of Chemistry 2012

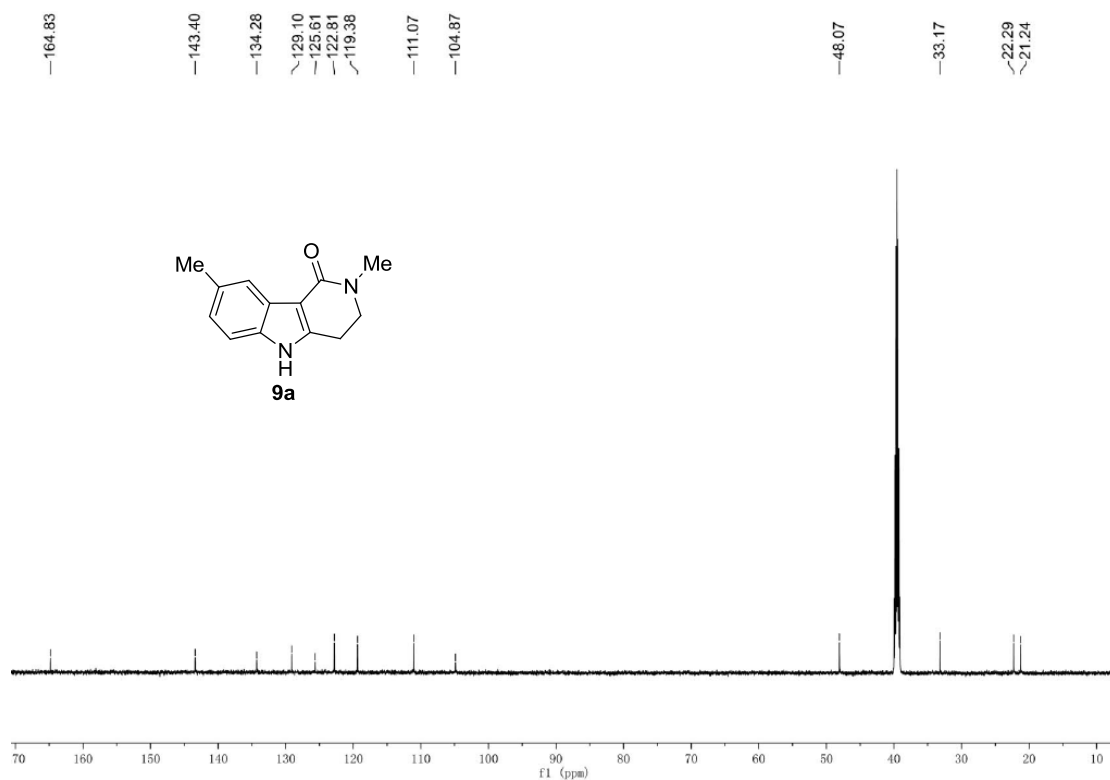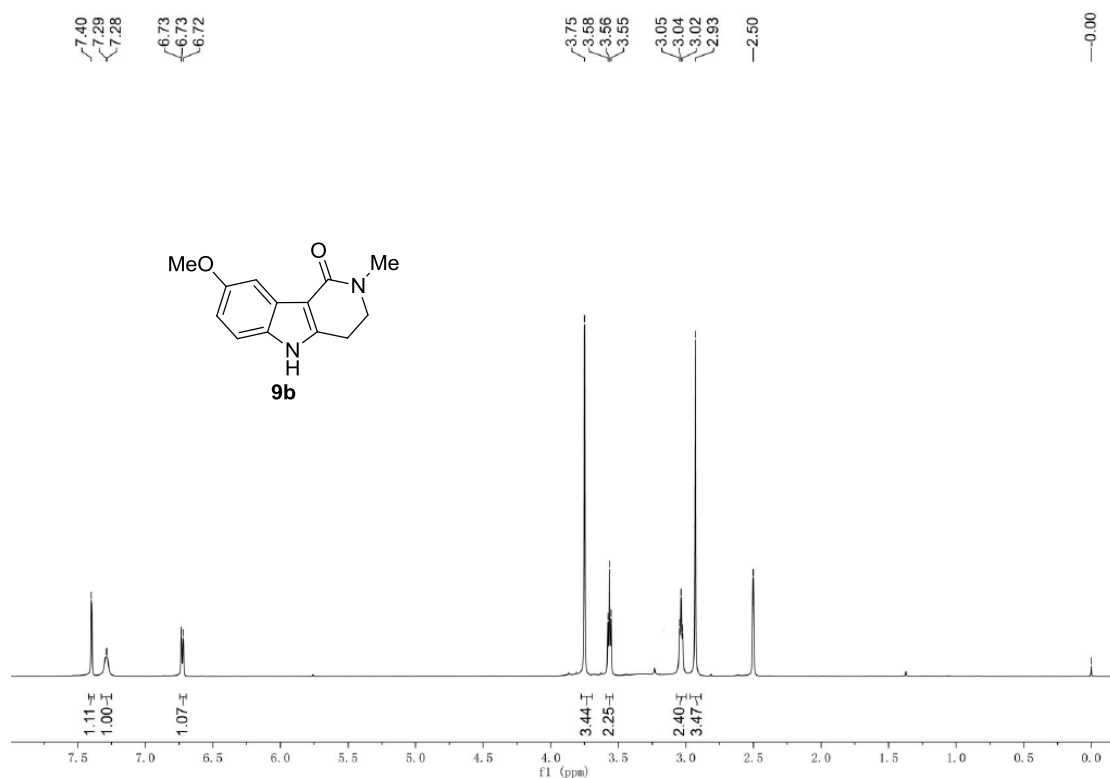

Supplementary Material (ESI) for Organic & Biomolecular Chemistry  
This journal is (c) The Royal Society of Chemistry 2012

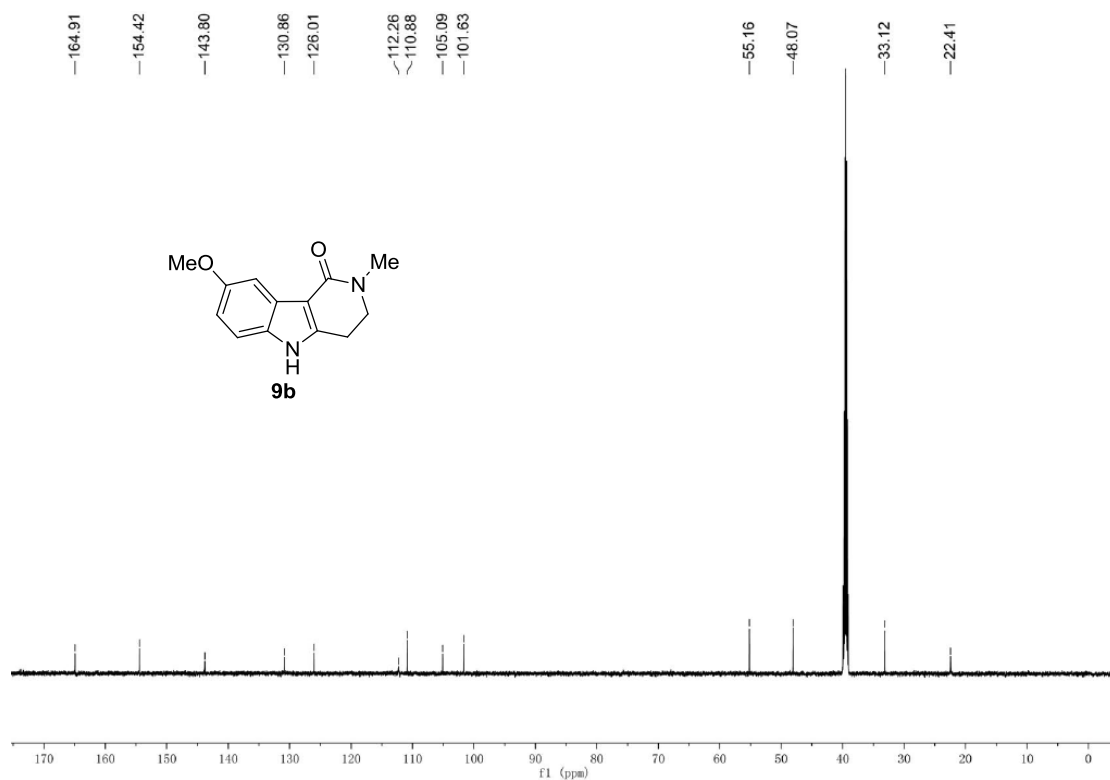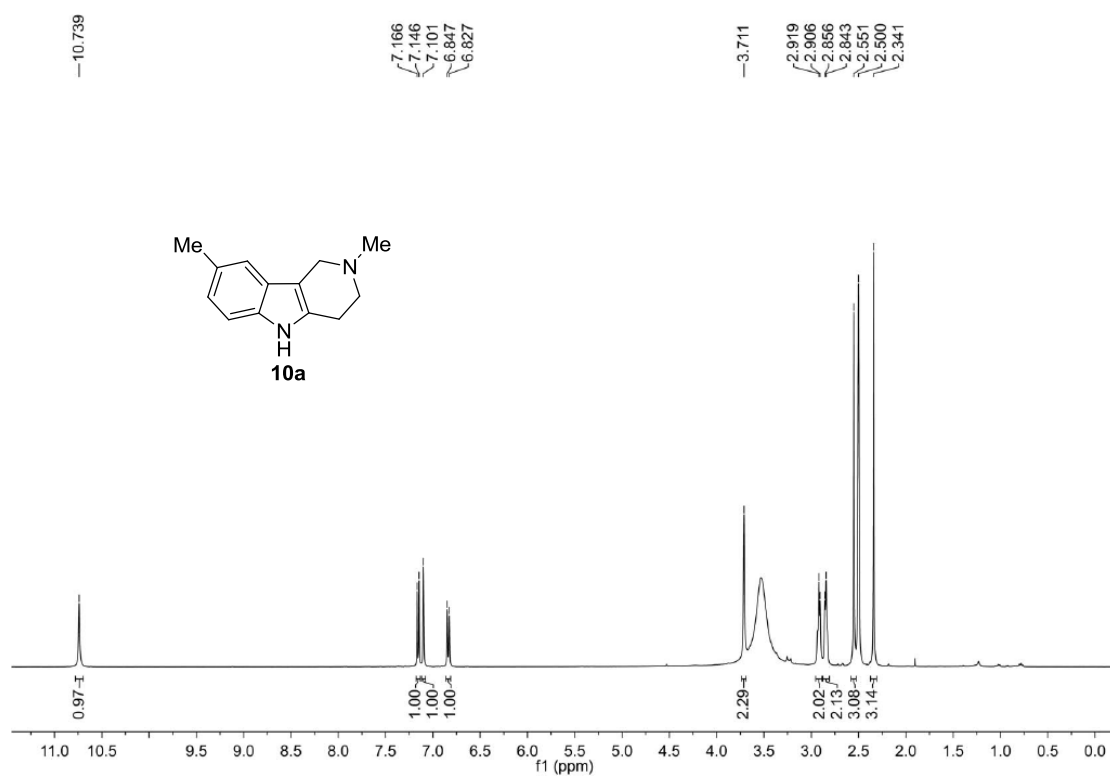

Supplementary Material (ESI) for Organic & Biomolecular Chemistry  
 This journal is (c) The Royal Society of Chemistry 2012

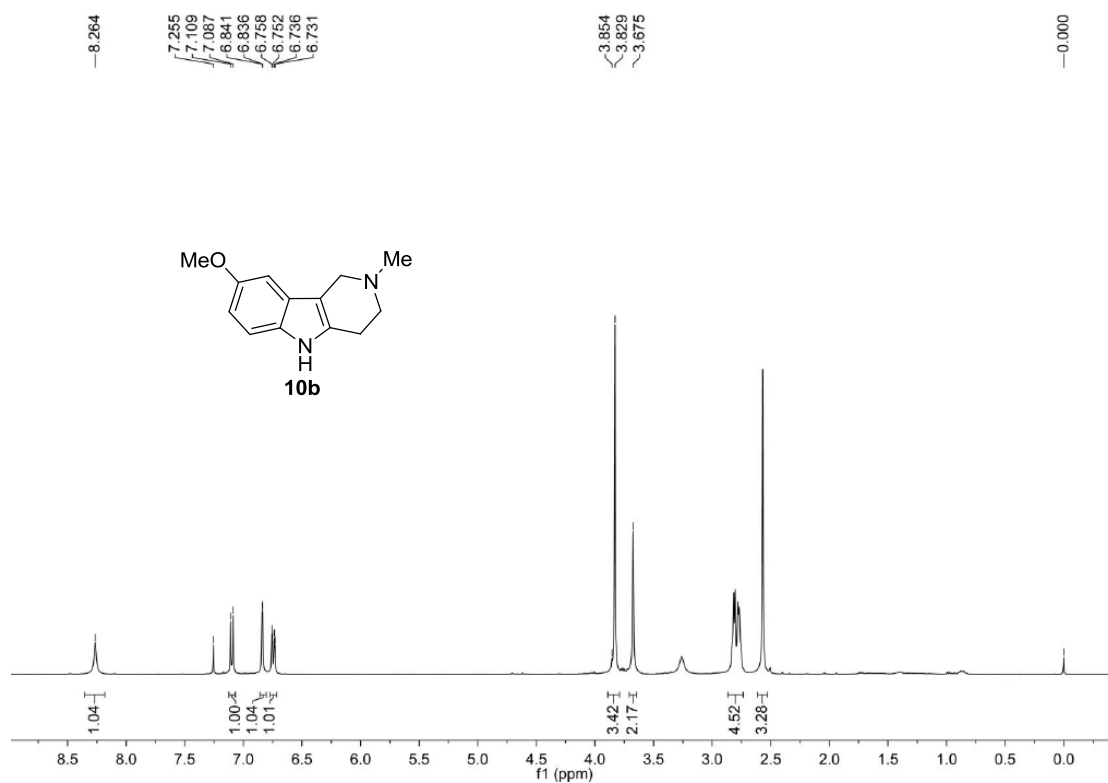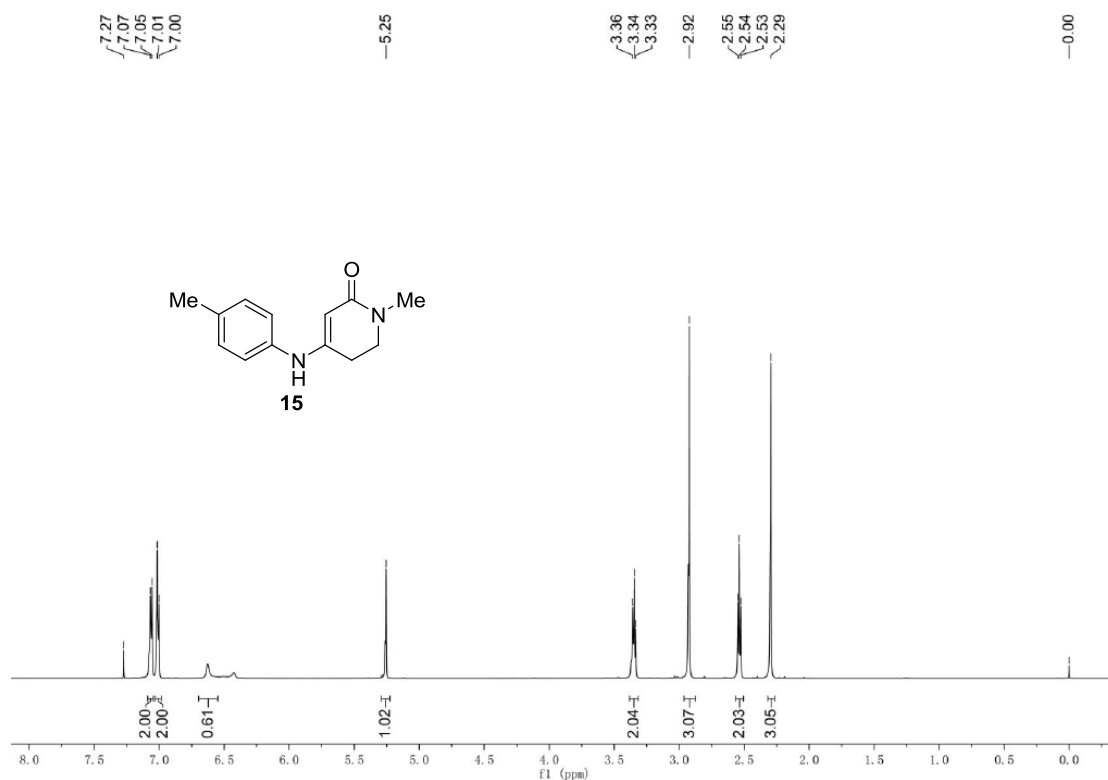

Supplementary Material (ESI) for Organic & Biomolecular Chemistry  
This journal is (c) The Royal Society of Chemistry 2012

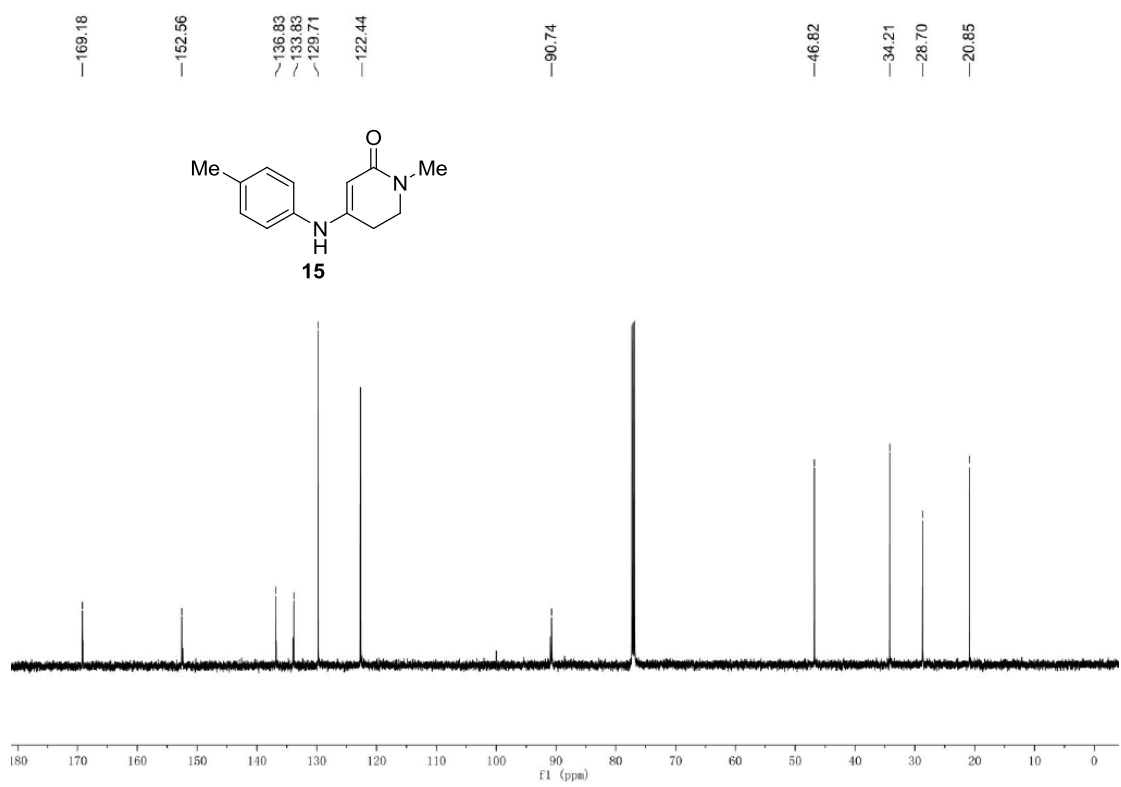

Supplement: c3ob00039g.pdf [file c3ob00039g.pdf]
